# Supplementary material for: The Effect of Age on the Architecture of Psychological and Cognitive Dimensions: A Network Perspective
Source: Research Square preprint supplement (doi:10.21203/rs.3.rs-6523434/v1), 2025-05-20
Supplement: Supplementary file 1 [file fe8dfcae467aba234dff5dd8.pdf]

**Table S1** Mean values, correlations, and network weights for the Young Adults network. The upper triangle shows the regularized partial correlations (network weights). The lower triangle displays the Pearson correlations between each pair of variables. The diagonal contains the mean and standard deviation for each variable of interest

|                   | AGREEABLENESS | CONSCIENTIOUSNESS | EXTRAVERSION | NEUROTICISM  | OPENNESS     | PIC_SEQ        | CARD_SORT      | FLANKER        | PROC_SPEED     | LIST_SORT     | ORAL_READ      | DD_200     | DD_40K      | EMOTION_REC | WITHDRAWAL  | THOUGHT_PROB | RULE_BREAK  | EXTERNALIZING | ANTISOCIAL  | HYPERACTIVITY | ANXIETY     | DEPRESSION | HOSTILITY    | AGGRESSIVITY | REJECTION    | STRESS       | WELL_BEING   | SELF_EFFICACY | SLEEP_QUALITY | PAIN_INTENSITY | PAIN_INTERFERENCE |
|-------------------|---------------|-------------------|--------------|--------------|--------------|----------------|----------------|----------------|----------------|---------------|----------------|------------|-------------|-------------|-------------|--------------|-------------|---------------|-------------|---------------|-------------|------------|--------------|--------------|--------------|--------------|--------------|---------------|---------------|----------------|-------------------|
| AGREEABLENESS     | 33.13 ± 5.83  | 0                 | 0            | 0            | 0            | 0              | 0              | 0              | 0              | 0             | 0              | 0          | 0           | 0.07        | -0.06       | 0            | 0           | -0.06         | -0.14       | 0             | 0           | 0          | -0.07        | -0.16        | -0.06        | 0            | 0            | 0             | 0             | 0              | 0                 |
| CONSCIENTIOUSNESS | 0.25          | 34.66 ± 5.52      | 0.08         | -0.11        | 0            | 0              | 0              | 0              | 0              | 0             | 0              | 0          | 0           | 0           | 0           | 0            | -0.14       | 0             | 0           | 0             | 0           | -0.1       | 0            | 0            | 0            | 0            | 0            | 0.06          | 0             | 0              | 0                 |
| EXTRAVERSION      | 0.27          | 0.33              | 30.38 ± 5.87 | -0.1         | 0            | 0              | 0              | 0              | 0              | 0             | 0              | 0          | 0           | 0           | -0.23       | 0            | 0           | 0             | 0           | 0             | 0           | 0          | 0            | 0            | 0            | 0.06         | 0.05         | 0             | 0             | 0              | 0                 |
| NEUROTICISM       | -0.33         | -0.43             | -0.42        | 16.81 ± 7.37 | 0            | 0              | 0              | 0              | 0              | 0             | 0              | 0          | 0           | 0           | 0           | 0            | 0           | 0             | 0           | 0             | 0.24        | 0.15       | 0.06         | 0            | 0            | 0.25         | 0            | -0.14         | 0             | 0              | 0.07              |
| OPENNESS          | 0.14          | -0.15             | -0.03        | -0.04        | 28.07 ± 6.26 | 0              | 0              | 0              | 0              | 0             | 0.25           | 0          | 0           | 0           | 0           | 0            | 0           | 0             | 0           | 0             | 0           | 0          | 0            | 0            | 0            | 0            | 0            | 0             | 0             | 0              | 0                 |
| PIC_SEQ           | 0.11          | -0.09             | 0.03         | -0.04        | 0.05         | 110.07 ± 13.27 | 0.07           | 0              | 0              | 0.13          | 0              | 0          | 0           | 0           | 0           | 0            | 0           | 0             | 0           | 0             | 0           | 0          | 0            | 0            | 0            | 0            | 0            | 0             | 0             | 0              | 0                 |
| CARD_SORT         | 0.15          | 0.02              | -0.02        | -0.09        | -0.03        | 0.24           | 114.29 ± 10.99 | 0.31           | 0.21           | 0             | 0.08           | 0          | 0           | 0.09        | 0           | 0            | 0           | 0             | 0           | 0             | 0           | 0          | 0            | 0            | 0            | 0            | 0            | 0             | 0             | 0              | 0                 |
| FLANKER           | 0.11          | -0.01             | 0.01         | -0.07        | -0.03        | 0.16           | 0.52           | 111.75 ± 10.49 | 0.23           | 0             | 0              | 0          | 0           | 0           | 0           | 0            | 0           | 0             | 0           | 0             | 0           | 0          | 0            | 0            | 0            | 0            | 0            | 0             | 0             | 0              | 0                 |
| PROC_SPEED        | 0.08          | -0.08             | -0.09        | 0.06         | -0.02        | 0.16           | 0.45           | 0.46           | 111.22 ± 11.76 | 0             | 0              | 0          | 0           | 0           | 0           | 0            | 0           | 0             | 0           | 0             | 0           | 0          | 0            | 0            | 0            | 0            | 0            | 0             | 0             | 0              | 0                 |
| LIST_SORT         | 0.11          | 0.03              | 0.07         | -0.11        | 0.1          | 0.29           | 0.17           | 0.1            | 0.14           | 110.1 ± 11.32 | 0.16           | 0          | 0           | 0           | 0           | 0            | 0           | 0             | 0           | 0             | 0           | 0          | 0            | 0            | 0            | 0            | 0            | 0             | 0             | 0              | 0                 |
| ORAL_READ         | 0.2           | -0.12             | -0.09        | -0.11        | 0.4          | 0.23           | 0.26           | 0.13           | 0.18           | 0.32          | 115.96 ± 10.81 | 0          | 0.15        | 0.08        | 0           | 0            | 0           | 0             | 0           | 0             | 0           | 0          | 0            | 0            | 0            | 0            | 0            | 0             | 0             | -0.07          | 0                 |
| DD_200            | 0.13          | -0.02             | 0.05         | -0.04        | 0.15         | 0.03           | -0.01          | -0.03          | 0.07           | 0.12          | 0.24           | 0.25 ± 0.2 | 0.56        | 0           | 0           | 0            | 0           | 0             | 0           | 0             | 0           | 0          | 0            | 0            | 0            | 0            | 0            | 0             | 0             | 0              | 0                 |
| DD_40K            | 0.13          | -0.06             | 0.01         | 0.03         | 0.16         | 0.05           | 0.11           | 0.07           | 0.14           | 0.08          | 0.34           | 0.71       | 0.47 ± 0.29 | 0           | 0           | 0            | 0           | 0             | 0           | 0             | 0           | 0          | 0            | 0            | 0            | 0            | 0            | 0             | 0             | 0              | 0                 |
| EMOTION_REC       | 0.23          | -0.01             | 0.02         | -0.07        | 0.05         | 0.2            | 0.26           | 0.14           | 0.19           | 0.17          | 0.25           | 0.02       | 0.09        | 35.63 ± 2.7 | 0           | 0            | 0           | 0             | 0           | 0             | 0           | 0          | 0            | 0            | 0            | 0            | 0            | 0             | 0             | 0              | 0                 |
| WITHDRAWAL        | -0.38         | -0.27             | -0.5         | 0.4          | 0.1          | -0.04          | -0.05          | -0.02          | -0.03          | -0.07         | -0.05          | -0.04      | -0.08       | -0.04       | 2.52 ± 2.54 | 0.2          | 0           | 0             | 0           | 0.06          | 0           | 0.24       | 0            | 0            | 0.1          | 0            | 0            | 0             | 0             | 0              | 0                 |
| THOUGHT_PROB      | -0.32         | -0.19             | -0.17        | 0.27         | 0.05         | 0.02           | -0.06          | -0.11          | -0.06          | -0.07         | -0.14          | -0.09      | -0.14       | 0.01        | 0.53        | 2.24 ± 2.28  | 0.06        | 0.1           | 0           | 0.07          | 0           | 0.09       | 0            | 0            | 0            | 0            | 0            | 0             | 0             | 0              | 0                 |
| RULE_BREAK        | -0.39         | -0.43             | -0.02        | 0.13         | 0.18         | 0              | -0.07          | -0.12          | -0.12          | -0.1          | -0.01          | -0.07      | -0.07       | -0.05       | 0.36        | 0.47         | 2.95 ± 3.01 | 0.29          | 0.36        | 0             | 0           | 0          | 0            | 0            | 0            | 0            | 0            | 0             | 0             | 0              | 0                 |
| EXTERNALIZING     | -0.49         | -0.37             | -0.01        | 0.3          | 0.1          | -0.04          | -0.1           | -0.08          | -0.1           | -0.05         | -0.03          | -0.04      | -0.07       | -0.06       | 0.46        | 0.53         | 0.82        | 9.35 ± 6.78   | 0.42        | 0.32          | 0           | 0.06       | 0            | 0            | 0            | 0            | 0            | 0             | 0             | 0              | 0                 |
| ANTISOCIAL        | -0.53         | -0.37             | -0.07        | 0.24         | 0.07         | -0.07          | -0.17          | -0.11          | -0.15          | -0.13         | -0.07          | -0.1       | -0.12       | -0.12       | 0.41        | 0.47         | 0.83        | 0.87          | 3.51 ± 3.24 | 0             | 0           | 0          | 0            | 0.16         | 0            | 0            | 0            | 0             | 0             | 0              | 0                 |
| HYPERACTIVITY     | -0.35         | -0.32             | -0.05        | 0.3          | 0.02         | 0.03           | -0.02          | 0              | -0.03          | -0.05         | -0.05          | -0.02      | -0.02       | 0.01        | 0.44        | 0.46         | 0.5         | 0.69          | 0.52        | 2.59 ± 2.07   | 0           | 0.08       | 0            | 0            | 0.05         | 0            | 0            | 0             | 0             | 0              | 0                 |
| ANXIETY           | -0.17         | -0.23             | -0.2         | 0.65         | 0.03         | 0.01           | -0.07          | -0.04          | 0.05           | -0.07         | -0.09          | -0.07      | -0.07       | 0.06        | 0.41        | 0.41         | 0.2         | 0.41          | 0.31        | 0.4           | 3.99 ± 2.65 | 0.24       | 0            | 0            | 0            | 0.15         | 0            | 0             | 0.08          | 0              | 0                 |
| DEPRESSION        | -0.22         | -0.43             | -0.36        | 0.62         | 0.07         | 0.04           | -0.02          | -0.02          | 0.03           | -0.07         | -0.05          | -0.07      | -0.06       | 0.03        | 0.62        | 0.5          | 0.35        | 0.51          | 0.44        | 0.48          | 0.65        | 4.5 ± 3.67 | 0.11         | 0            | 0            | 0            | -0.07        | 0             | 0.12          | 0              | 0                 |
| HOSTILITY         | -0.35         | -0.29             | -0.33        | 0.51         | -0.06        | -0.03          | -0.04          | -0.04          | 0.05           | -0.03         | -0.1           | -0.04      | -0.1        | -0.05       | 0.42        | 0.32         | 0.24        | 0.34          | 0.31        | 0.32          | 0.46        | 0.51       | 50.96 ± 8.73 | 0            | 0.12         | 0.18         | -0.1         | -0.09         | 0             | 0              | 0                 |
| AGGRESSIVITY      | -0.44         | -0.22             | -0.13        | 0.13         | 0.03         | -0.19          | -0.1           | -0.1           | -0.09          | 0.01          | -0.05          | -0.05      | -0.08       | -0.11       | 0.32        | 0.27         | 0.43        | 0.43          | 0.51        | 0.22          | 0.15        | 0.2        | 0.27         | 52.52 ± 9.24 | 0            | 0            | 0            | 0             | 0             | 0              | 0                 |
| REJECTION         | -0.35         | -0.31             | -0.36        | 0.45         | 0            | -0.1           | -0.02          | 0.02           | 0.06           | -0.06         | 0.01           | -0.05      | -0.07       | -0.08       | 0.45        | 0.21         | 0.23        | 0.32          | 0.28        | 0.36          | 0.36        | 0.37       | 0.49         | 0.28         | 48.82 ± 9.08 | 0.17         | -0.16        | 0             | 0             | 0              | 0                 |
| STRESS            | -0.22         | -0.32             | -0.3         | 0.68         | 0.04         | -0.1           | -0.09          | -0.04          | 0.05           | -0.09         | -0.09          | -0.04      | -0.04       | -0.03       | 0.36        | 0.27         | 0.22        | 0.33          | 0.29        | 0.31          | 0.59        | 0.52       | 0.59         | 0.22         | 0.54         | 48.88 ± 9.58 | -0.17        | -0.18         | 0             | 0              | 0                 |
| WELL_BEING        | 0.24          | 0.28              | 0.37         | -0.47        | -0.07        | 0.1            | 0.12           | 0.11           | 0.05           | 0.01          | 0.03           | 0.07       | 0.1         | 0           | -0.42       | -0.35        | -0.29       | -0.34         | -0.34       | -0.25         | -0.43       | -0.48      | -0.48        | -0.26        | -0.5         | -0.57        | 53.81 ± 9.37 | 0.1           | 0             | 0              | 0                 |
| SELF_EFFICACY     | 0.12          | 0.34              | 0.34         | -0.52        | 0.15         | -0.01          | 0.04           | -0.03          | -0.03          | 0.06          | 0.14           | 0.13       | 0.09        | 0.06        | -0.27       | -0.17        | -0.03       | -0.13         | -0.11       | -0.17         | -0.39       | -0.38      | -0.45        | -0.08        | -0.31        | -0.56        | 0.45         | 50.89 ± 9.1   | 0             | 0              | 0                 |
| SLEEP_QUALITY     | -0.19         | -0.1              | -0.08        | 0.24         | 0.07         | 0.04           | -0.02          | -0.05          | -0.01          | -0.03         | -0.11          | -0.12      | -0.17       | 0.04        | 0.24        | 0.29         | 0.2         | 0.26          | 0.23        | 0.25          | 0.37        | 0.4        | 0.18         | 0.16         | 0.18         | 0.32         | -0.28        | -0.11         | 4.97 ± 2.79   | 0.07           | 0                 |
| PAIN_INTENSITY    | -0.14         | -0.04             | -0.14        | 0.25         | -0.09        | -0.11          | -0.08          | -0.05          | -0.02          | -0.07         | -0.23          | -0.11      | -0.17       | -0.07       | 0.16        | 0.15         | 0.03        | 0.13          | 0.1         | 0.1           | 0.24        | 0.2        | 0.19         | 0.12         | 0.13         | 0.22         | -0.19        | -0.23         | 0.26          | 1.31 ± 1.65    | 0.52              |
| PAIN_INTERFERENCE | -0.1          | -0.15             | -0.16        | 0.29         | -0.03        | 0.01           | -0.09          | 0              | -0.05          | -0.06         | -0.13          | -0.08      | -0.07       | -0.02       | 0.2         | 0.18         | 0.04        | 0.16          | 0.09        | 0.14          | 0.21        | 0.25       | 0.09         | 0.06         | 0.15         | 0.24         | -0.16        | -0.2          | 0.22          | 0.67           | 45.45 ± 7.43      |

**Table S2** Mean values, correlations, and network weights for the Middle-Aged Adults network. The upper triangle shows the regularized partial correlations (network weights). The lower triangle displays the Pearson correlations between each pair of variables. The diagonal contains the mean and standard deviation for each variable of interest

|                   | AGREEABLENESS | CONSCIENTIOUSNESS | EXTRAVERSION | NEUROTICISM | OPENNESS     | PIC_SEQ        | CARD_SORT     | FLANKER     | PROC_SPEED     | LIST_SORT      | ORAL_READ     | DD_200      | DD_40K      | EMOTION_REC  | WITHDRAWAL  | THOUGHT_PROB | RULE_BREAK   | EXTERNALIZING | ANTISOCIAL   | HYPERACTIVITY | ANXIETY      | DEPRESSION   | HOSTILITY    | AGGRESSIVITY | REJECTION   | STRESS       | WELL_BEING   | SELF_EFFICACY | SLEEP_QUALITY | PAIN_INTENSITY | PAIN_INTERFERENCE |   |
|-------------------|---------------|-------------------|--------------|-------------|--------------|----------------|---------------|-------------|----------------|----------------|---------------|-------------|-------------|--------------|-------------|--------------|--------------|---------------|--------------|---------------|--------------|--------------|--------------|--------------|-------------|--------------|--------------|---------------|---------------|----------------|-------------------|---|
| AGREEABLENESS     | 34.69 ± 5.77  | 0                 | 0            | 0           | 0            | 0              | 0             | 0           | 0              | 0              | 0             | 0           | 0           | 0            | 0           | 0            | 0            | -0.1          | -0.05        | 0             | 0            | 0            | -0.15        | -0.1         | -0.16       | 0            | 0            | 0             | 0             | 0              | 0                 |   |
| CONSCIENTIOUSNESS | 0.29          | 34.7 ± 6.29       | 0            | -0.13       | 0            | 0              | 0             | 0           | 0              | 0              | 0             | 0           | 0           | 0            | 0           | 0            | -0.06        | 0             | 0            | 0             | 0            | -0.14        | 0            | 0            | 0           | 0            | 0.07         | 0.11          | 0             | 0              | 0                 |   |
| EXTRAVERSION      | 0.31          | 0.36              | 29.07 ± 6.2  | -0.12       | 0            | 0              | 0             | 0           | 0              | 0              | 0             | 0           | 0           | 0            | -0.3        | 0            | 0            | 0             | 0            | 0             | 0            | 0            | 0            | 0            | 0           | 0            | 0            | 0.05          | 0             | 0              | 0                 |   |
| NEUROTICISM       | -0.38         | -0.51             | -0.5         | 16.2 ± 7.67 | 0            | 0              | 0             | 0           | 0              | 0              | 0             | 0           | 0           | 0            | 0           | 0.05         | 0            | 0             | 0            | 0             | 0.2          | 0.16         | 0.22         | 0            | 0           | 0.31         | 0            | 0             | 0             | 0              | 0                 |   |
| OPENNESS          | 0.1           | -0.03             | 0.06         | 0           | 30.02 ± 6.01 | 0.07           | 0             | 0           | 0.05           | 0              | 0.23          | 0           | 0           | 0            | 0           | 0            | 0            | 0             | 0            | 0             | 0            | 0            | 0            | 0            | 0           | 0            | 0            | 0.07          | 0             | 0              | 0                 |   |
| PIC_SEQ           | 0.14          | -0.01             | 0.07         | -0.05       | 0.23         | 105.65 ± 14.66 | 0.07          | 0.15        | 0.05           | 0.19           | 0             | 0           | 0           | 0            | 0           | 0            | 0            | 0             | 0            | 0             | 0            | 0            | 0            | 0            | 0           | 0            | 0            | 0             | 0             | 0              | 0                 |   |
| CARD_SORT         | 0.1           | 0.06              | 0.01         | -0.03       | 0.15         | 0.32           | 105.74 ± 9.04 | 0.39        | 0.13           | 0.06           | 0             | 0           | 0           | 0            | 0           | 0            | 0            | 0             | 0            | 0             | 0            | 0            | 0            | 0            | 0           | 0            | 0            | 0             | 0             | 0              | 0                 |   |
| FLANKER           | -0.03         | -0.15             | -0.07        | 0.07        | 0.2          | 0.37           | 0.58          | 99.6 ± 7.23 | 0.21           | 0              | 0.06          | 0           | 0           | 0            | 0           | 0            | 0            | 0             | 0            | 0             | 0            | 0            | 0            | 0            | 0           | 0            | 0            | 0             | 0             | 0              | 0                 |   |
| PROC_SPEED        | -0.03         | -0.14             | -0.03        | 0.13        | 0.22         | 0.27           | 0.38          | 0.44        | 106.01 ± 16.54 | 0              | 0.06          | 0           | 0           | 0.06         | 0           | 0            | 0            | 0             | 0            | 0             | 0            | 0            | 0            | 0            | 0           | 0            | 0            | 0             | 0             | 0              | 0                 |   |
| LIST_SORT         | 0.07          | -0.04             | -0.03        | 0           | 0.21         | 0.38           | 0.29          | 0.3         | 0.25           | 103.09 ± 11.24 | 0.21          | 0           | 0.06        | 0.08         | 0           | 0            | 0            | 0             | 0            | 0             | 0            | 0            | 0            | 0            | 0           | 0            | 0            | 0             | 0             | 0              | 0                 |   |
| ORAL_READ         | 0.12          | -0.07             | -0.08        | 0.05        | 0.38         | 0.28           | 0.26          | 0.3         | 0.28           | 0.41           | 109.02 ± 7.17 | 0           | 0.1         | 0.11         | 0.06        | 0            | 0            | 0             | 0            | 0             | 0            | 0            | 0            | 0            | 0           | 0            | 0            | 0             | 0             | 0              | 0                 |   |
| DD_200            | 0.05          | -0.1              | -0.07        | -0.05       | 0.12         | 0.14           | 0             | 0.11        | 0.01           | 0.2            | 0.19          | 0.26 ± 0.21 | 0.61        | 0            | 0           | 0            | 0            | 0             | 0            | 0             | 0            | 0            | 0            | 0            | 0           | 0            | 0            | 0             | 0             | 0              | 0                 |   |
| DD_40K            | 0.05          | -0.08             | -0.08        | -0.03       | 0.18         | 0.19           | 0.07          | 0.16        | 0.1            | 0.25           | 0.28          | 0.71        | 0.48 ± 0.29 | 0            | 0           | 0            | 0            | 0             | 0            | 0             | 0            | 0            | 0            | 0            | 0           | 0            | 0            | 0             | 0             | 0              | 0                 |   |
| EMOTION_REC       | 0.13          | 0.03              | -0.02        | -0.07       | 0.18         | 0.2            | 0.21          | 0.2         | 0.21           | 0.25           | 0.27          | 0.08        | 0.12        | 34.51 ± 3.21 | 0           | 0            | 0            | 0             | 0            | 0             | 0            | 0            | 0            | 0            | 0           | 0            | 0            | 0             | 0             | 0              | 0                 |   |
| WITHDRAWAL        | -0.36         | -0.36             | -0.59        | 0.55        | 0.04         | -0.04          | 0.02          | 0.15        | 0.12           | 0.17           | 0.21          | 0.03        | 0.08        | 0.04         | 6.36 ± 1.53 | 0.14         | 0            | 0.06          | 0            | 0             | 0.11         | 0.23         | 0.08         | 0            | 0.05        | 0            | 0            | 0             | 0             | 0              | 0                 |   |
| THOUGHT_PROB      | -0.26         | -0.23             | -0.27        | 0.49        | 0.13         | -0.05          | 0.02          | 0.1         | 0.11           | 0.05           | 0.13          | 0.02        | 0.03        | 0.02         | 0.52        | 11.44 ± 1.73 | 0            | 0             | 0            | 0.19          | 0.14         | 0.07         | 0            | 0            | 0           | 0            | 0            | 0             | 0             | 0              | 0                 |   |
| RULE_BREAK        | -0.36         | -0.4              | -0.2         | 0.31        | 0.04         | -0.1           | -0.12         | 0.08        | 0.1            | 0.03           | 0.01          | -0.04       | -0.03       | -0.04        | 0.42        | 0.38         | 11.19 ± 1.66 | 0.29          | 0.28         | 0             | 0            | 0            | 0            | 0.06         | 0           | 0            | 0            | 0             | 0             | 0              | 0                 |   |
| EXTERNALIZING     | -0.52         | -0.44             | -0.32        | 0.48        | -0.01        | -0.09          | -0.13         | 0.08        | 0.14           | 0.03           | 0.02          | -0.01       | 0.02        | -0.03        | 0.53        | 0.47         | 0.84         | 21.51 ± 2.82  | 0.61         | 0.25          | 0            | 0            | 0            | 0            | 0           | 0            | 0            | 0             | 0             | 0              | 0                 |   |
| ANTISOCIAL        | -0.5          | -0.42             | -0.28        | 0.45        | 0.02         | -0.11          | -0.12         | 0.08        | 0.15           | 0.05           | 0.02          | -0.03       | 0           | -0.02        | 0.51        | 0.43         | 0.83         | 0.95          | 22.37 ± 2.66 | 0             | 0            | 0            | 0            | 0            | 0           | 0            | 0            | 0             | 0             | 0              | 0                 | 0 |
| HYPERACTIVITY     | -0.31         | -0.36             | -0.13        | 0.36        | -0.01        | -0.02          | -0.06         | 0.1         | 0.16           | 0.1            | 0.05          | 0.06        | 0.09        | -0.02        | 0.39        | 0.49         | 0.48         | 0.65          | 0.52         | 7.37 ± 1.55   | 0.05         | 0            | 0            | 0            | 0           | 0            | 0            | 0             | 0             | 0              | 0                 |   |
| ANXIETY           | -0.24         | -0.37             | -0.38        | 0.66        | 0.02         | 0.01           | 0.06          | 0.18        | 0.15           | 0.15           | 0.16          | 0           | 0.01        | 0.02         | 0.58        | 0.53         | 0.35         | 0.48          | 0.43         | 0.43          | 10.47 ± 2.46 | 0.22         | 0            | 0            | 0           | 0.12         | 0            | 0             | 0             | 0              | 0                 |   |
| DEPRESSION        | -0.18         | -0.51             | -0.49        | 0.67        | 0.09         | 0.04           | 0.02          | 0.19        | 0.13           | 0.16           | 0.2           | 0.06        | 0.1         | 0.04         | 0.66        | 0.51         | 0.38         | 0.49          | 0.48         | 0.42          | 0.67         | 17.41 ± 3.47 | 0            | 0            | 0           | 0            | 0            | 0             | 0             | 0.23           | 0.05              | 0 |
| HOSTILITY         | -0.47         | -0.37             | -0.42        | 0.65        | -0.09        | -0.07          | -0.03         | 0.1         | 0.11           | -0.01          | 0.01          | -0.13       | -0.12       | -0.02        | 0.52        | 0.34         | 0.37         | 0.5           | 0.48         | 0.33          | 0.48         | 0.54         | 10.19 ± 5.33 | 0            | 0.18        | 0.09         | 0            | 0             | 0             | 0              | 0                 |   |
| AGGRESSIVITY      | -0.32         | -0.09             | -0.04        | 0.15        | 0.05         | -0.02          | -0.05         | 0.04        | 0.06           | 0.06           | -0.06         | -0.02       | -0.07       | -0.03        | 0.18        | 0.24         | 0.37         | 0.39          | 0.39         | 0.25          | 0.18         | 0.1          | 0.28         | 6.78 ± 3.39  | 0           | 0            | 0            | 0             | 0             | 0              | 0                 |   |
| REJECTION         | -0.44         | -0.26             | -0.31        | 0.49        | -0.13        | -0.11          | -0.03         | 0.04        | -0.09          | 0.02           | -0.01         | -0.05       | -0.07       | -0.02        | 0.42        | 0.29         | 0.25         | 0.35          | 0.33         | 0.25          | 0.37         | 0.37         | 0.54         | 0.22         | 14.64 ± 5.9 | 0.16         | -0.12        | 0             | 0.06          | 0.12           | 0                 |   |
| STRESS            | -0.33         | -0.41             | -0.41        | 0.72        | -0.08        | -0.05          | 0.01          | 0.13        | 0.14           | -0.01          | 0             | -0.07       | -0.07       | -0.02        | 0.45        | 0.44         | 0.32         | 0.46          | 0.43         | 0.36          | 0.59         | 0.57         | 0.58         | 0.18         | 0.54        | 23.75 ± 5.88 | -0.18        | -0.19         | 0             | 0              | 0                 |   |
| WELL_BEING        | 0.24          | 0.33              | 0.27         | -0.42       | 0.09         | 0.06           | 0.03          | -0.03       | -0.03          | 0.06           | 0.01          | 0.15        | 0.1         | 0.01         | -0.26       | -0.14        | -0.21        | -0.28         | -0.26        | -0.13         | -0.34        | -0.37        | -0.38        | -0.09        | -0.4        | -0.49        | 20.93 ± 9.25 | 0             | 0             | 0              | 0                 |   |
| SELF_EFFICACY     | 0.13          | 0.32              | 0.27         | -0.34       | 0.16         | 0.11           | 0.04          | 0.02        | 0.01           | 0.05           | -0.05         | 0.03        | 0.04        | 0.04         | -0.13       | -0.16        | -0.16        | -0.2          | -0.18        | -0.06         | -0.21        | -0.19        | -0.2         | -0.02        | -0.21       | -0.42        | 0.27         | 20.46 ± 9.65  | 0             | 0              | 0                 |   |
| SLEEP_QUALITY     | -0.08         | -0.28             | -0.29        | 0.36        | -0.01        | -0.09          | -0.02         | 0.06        | 0.05           | 0.12           | 0.04          | 0.01        | -0.01       | 0.08         | 0.33        | 0.21         | 0.22         | 0.28          | 0.29         | 0.27          | 0.33         | 0.49         | 0.33         | 0.1          | 0.33        | 0.34         | -0.27        | -0.17         | 4.55 ± 2.58   | 0.11           | 0                 |   |
| PAIN_INTENSITY    | -0.1          | -0.17             | -0.11        | 0.26        | 0.05         | 0.03           | 0.01          | 0.05        | -0.02          | 0.15           | -0.04         | 0.06        | 0.04        | 0.14         | 0.11        | 0.08         | 0.07         | 0.11          | 0.11         | 0.14          | 0.22         | 0.29         | 0.23         | 0.17         | 0.31        | 0.26         | -0.17        | -0.09         | 0.28          | 1.6 ± 1.94     | -0.1              |   |
| PAIN_INTERFERENCE | 0.12          | 0.17              | 0.05         | -0.2        | -0.1         | -0.06          | 0.01          | -0.04       | -0.04          | -0.1           | 0.04          | 0.07        | 0.05        | -0.08        | -0.06       | -0.1         | -0.09        | -0.08         | -0.11        | -0.11         | -0.13        | -0.13        | -0.13        | -0.1         | -0.16       | -0.16        | 0.07         | 0.17          | -0.06         | -0.21          | 9.86 ± 3.12       |   |

**Table S3** Mean values, correlations, and network weights for the Older Adults network. The upper triangle shows the regularized partial correlations (network weights). The lower triangle displays the Pearson correlations between each pair of variables. The diagonal contains the mean and standard deviation for each variable of interest

|                   | AGREEABLENESS | CONSCIENTIOUSNESS | EXTRAVERSION | NEUROTICISM | OPENNESS     | PIC_SEQ       | CARD_SORT     | FLANKER     | PROC_SPEED   | LIST_SORT     | ORAL_READ     | DD_200     | DD_40K      | EMOTION_REC | WITHDRAWAL  | THOUGHT_PROB | RULE_BREAK  | EXTERNALIZING | ANTISOCIAL | HYPERACTIVITY | ANXIETY     | DEPRESSION   | HOSTILITY  | AGGRESSIVITY | REJECTION    | STRESS       | WELL_BEING   | SELF_EFFICACY | SLEEP_QUALITY | PAIN_INTENSITY | PAIN_INTERFERENCE |   |
|-------------------|---------------|-------------------|--------------|-------------|--------------|---------------|---------------|-------------|--------------|---------------|---------------|------------|-------------|-------------|-------------|--------------|-------------|---------------|------------|---------------|-------------|--------------|------------|--------------|--------------|--------------|--------------|---------------|---------------|----------------|-------------------|---|
| AGREEABLENESS     | 36.09 ± 5.05  | 0                 | 0            | -0.17       | 0            | 0             | 0             | 0           | 0            | 0             | 0             | 0          | 0           | 0           | -0.05       | 0            | 0           | 0             | -0.07      | 0             | 0           | 0            | 0          | -0.12        | -0.09        | 0            | 0.08         | 0             | 0             | 0              | 0                 |   |
| CONSCIENTIOUSNESS | 0.33          | 35.86 ± 6.09      | 0.08         | -0.14       | 0            | 0             | 0             | 0           | 0            | 0             | 0             | 0          | 0           | 0           | 0           | 0            | -0.06       | 0             | 0          | 0             | 0           | -0.11        | 0          | 0            | 0            | 0            | 0            | 0.14          | 0             | 0              | 0                 |   |
| EXTRAVERSION      | 0.29          | 0.36              | 30 ± 5.78    | -0.12       | 0            | 0             | 0             | 0           | 0            | 0             | 0             | 0          | 0           | 0           | -0.09       | 0            | 0           | 0             | 0          | 0             | 0           | 0            | 0          | 0            | 0            | 0            | 0.1          | 0.11          | 0             | 0              | 0                 |   |
| NEUROTICISM       | -0.47         | -0.47             | -0.41        | 12.83 ± 6.4 | 0            | 0             | 0             | 0           | 0            | 0             | 0             | 0          | 0           | 0           | 0           | 0            | 0           | 0             | 0          | 0             | 0           | 0.32         | 0.1        | 0.2          | 0            | 0.06         | 0.12         | 0             | -0.06         | 0              | 0                 | 0 |
| OPENNESS          | 0.17          | 0.14              | 0.1          | -0.21       | 30.11 ± 5.76 | 0             | 0             | 0           | 0            | 0             | 0.07          | 0          | 0           | 0           | 0           | 0            | 0           | 0             | 0          | 0             | 0           | 0            | 0          | 0            | 0            | 0            | 0            | 0.08          | 0             | 0              | 0                 |   |
| PIC_SEQ           | 0.12          | 0.04              | -0.04        | 0.06        | 0.12         | 96.16 ± 12.73 | 0             | 0.08        | 0            | 0             | 0             | 0          | 0           | 0           | 0           | 0            | 0           | 0             | 0          | 0             | 0           | 0            | 0          | 0            | 0            | 0            | 0            | 0             | 0             | 0              | 0                 |   |
| CARD_SORT         | -0.02         | 0.07              | -0.05        | -0.06       | 0.18         | 0.24          | 101.27 ± 8.54 | 0.32        | 0.06         | 0.18          | 0             | 0          | 0           | 0           | 0           | 0            | 0           | 0             | 0          | 0             | 0           | 0            | 0          | 0            | 0            | 0            | 0            | 0             | 0             | 0              | 0                 |   |
| FLANKER           | 0.1           | 0.11              | -0.03        | -0.17       | 0.2          | 0.28          | 0.55          | 93.94 ± 8.6 | 0.24         | 0.09          | 0             | 0          | 0           | 0           | 0           | 0            | 0           | 0             | 0          | 0             | 0           | 0            | 0          | 0            | 0            | 0            | 0            | 0             | 0             | 0              | 0                 |   |
| PROC_SPEED        | 0.07          | 0.03              | -0.06        | -0.08       | 0.06         | 0.21          | 0.34          | 0.46        | 90.84 ± 17.1 | 0             | 0             | 0          | 0           | 0           | 0           | 0            | 0           | 0             | 0          | 0             | 0           | 0            | 0          | 0            | 0            | 0            | 0            | 0             | 0             | 0              | 0                 |   |
| LIST_SORT         | 0.13          | 0.1               | -0.03        | -0.17       | 0.21         | 0.23          | 0.41          | 0.35        | 0.2          | 96.94 ± 10.94 | 0.11          | 0          | 0           | 0           | 0           | 0            | 0           | 0             | 0          | 0             | 0           | 0            | 0          | 0            | 0            | 0            | 0            | 0             | 0             | 0              | 0                 |   |
| ORAL_READ         | 0.13          | 0.08              | -0.08        | -0.1        | 0.25         | 0.17          | 0.2           | 0.22        | 0.04         | 0.3           | 110.56 ± 7.16 | 0          | 0           | 0           | 0           | 0            | 0           | 0             | 0          | 0             | 0           | 0            | 0          | 0            | 0            | 0            | 0            | 0             | 0             | 0              | 0                 |   |
| DD_200            | 0.01          | -0.06             | 0            | -0.06       | 0.08         | -0.01         | 0.08          | 0.11        | 0.07         | 0.09          | 0.16          | 0.3 ± 0.21 | 0.6         | 0           | 0           | 0            | 0           | 0             | 0          | 0             | 0           | 0            | 0          | 0            | 0            | 0            | 0            | 0             | 0             | 0              | 0                 |   |
| DD_40K            | -0.06         | -0.16             | -0.14        | 0.05        | 0.08         | 0.02          | 0.07          | 0.11        | 0.01         | 0.06          | 0.18          | 0.78       | 0.46 ± 0.26 | 0           | 0           | 0            | 0           | 0             | 0          | 0             | 0           | 0            | 0          | 0            | 0            | 0            | 0            | 0             | 0             | 0              | 0                 |   |
| EMOTION_REC       | 0.02          | 0.02              | 0.08         | 0.09        | 0.12         | 0.16          | 0.19          | 0.21        | 0.12         | 0.09          | 0.17          | 0.02       | 0.05        | 33 ± 3.5    | 0           | 0            | 0           | 0             | 0          | 0             | 0           | 0            | 0          | 0            | 0            | 0            | 0            | 0             | 0             | 0              | 0                 |   |
| WITHDRAWAL        | -0.29         | -0.2              | -0.31        | 0.23        | -0.05        | -0.02         | -0.03         | -0.01       | 0.05         | 0.01          | 0.07          | 0.1        | 0.07        | -0.14       | 3.36 ± 0.69 | 0.12         | 0           | 0             | 0          | 0             | 0           | 0.06         | 0          | 0            | 0.07         | 0            | 0            | 0             | 0             | 0              | 0                 |   |
| THOUGHT_PROB      | -0.25         | -0.18             | -0.08        | 0.31        | 0.11         | -0.09         | -0.01         | -0.05       | -0.07        | -0.02         | 0.01          | -0.01      | 0.03        | -0.03       | 0.35        | 6.66 ± 0.89  | 0.07        | 0             | 0          | 0.05          | 0.1         | 0.09         | 0          | 0            | 0            | 0.06         | 0            | 0             | 0             | 0              | 0                 |   |
| RULE_BREAK        | -0.15         | -0.31             | -0.09        | 0.26        | -0.09        | 0.02          | 0.02          | -0.08       | 0.01         | 0.01          | 0.01          | -0.02      | -0.03       | -0.11       | 0.18        | 0.36         | 4.32 ± 0.56 | 0.44          | 0          | 0.27          | 0           | 0            | 0          | 0            | 0            | 0            | 0            | 0             | 0             | 0              | 0                 |   |
| EXTERNALIZING     | -0.32         | -0.24             | -0.13        | 0.34        | -0.12        | 0.01          | 0.03          | -0.06       | 0.01         | -0.02         | 0.07          | 0          | 0           | -0.1        | 0.24        | 0.35         | 0.79        | 7.65 ± 0.86   | 0.58       | 0             | 0           | 0            | 0          | 0            | 0            | 0            | 0            | 0             | 0             | 0              | 0                 |   |
| ANTISOCIAL        | -0.34         | -0.14             | -0.13        | 0.28        | -0.07        | 0.04          | 0.06          | -0.01       | 0.06         | -0.01         | 0.13          | 0.04       | 0.05        | -0.09       | 0.27        | 0.22         | 0.44        | 0.86          | 6.4 ± 0.62 | 0             | 0           | 0            | 0          | 0            | 0            | 0            | 0            | 0             | 0             | 0              | 0                 |   |
| HYPERACTIVITY     | -0.18         | -0.27             | 0.01         | 0.27        | -0.05        | -0.04         | 0.07          | -0.03       | 0.05         | 0.04          | -0.05         | -0.08      | -0.08       | -0.05       | 0.09        | 0.33         | 0.58        | 0.48          | 0.22       | 3.79 ± 1      | 0.09        | 0            | 0          | 0            | 0            | 0            | 0.05         | 0             | 0             | 0              | 0                 |   |
| ANXIETY           | -0.19         | -0.23             | -0.24        | 0.57        | -0.09        | 0.05          | 0.02          | 0           | 0.05         | -0.01         | 0.07          | -0.06      | 0.03        | 0.08        | 0.31        | 0.4          | 0.3         | 0.38          | 0.31       | 0.37          | 6.17 ± 1.43 | 0.26         | 0          | 0            | 0            | 0.08         | 0            | 0             | 0             | 0              | 0                 |   |
| DEPRESSION        | -0.15         | -0.41             | -0.33        | 0.51        | -0.1         | 0.02          | -0.06         | -0.06       | 0            | -0.08         | 0.03          | -0.06      | 0.06        | -0.03       | 0.33        | 0.39         | 0.26        | 0.34          | 0.29       | 0.28          | 0.6         | 13.83 ± 2.18 | 0          | 0            | 0            | 0.05         | 0            | 0             | 0.26          | 0              | 0                 |   |
| HOSTILITY         | -0.34         | -0.18             | -0.24        | 0.51        | -0.1         | -0.04         | 0.02          | -0.11       | -0.06        | -0.1          | -0.08         | -0.09      | -0.02       | 0.02        | 0.22        | 0.23         | 0.07        | 0.22          | 0.25       | 0.1           | 0.34        | 0.34         | 7.76 ± 3.9 | 0.09         | 0.14         | 0.14         | 0            | 0             | 0             | 0              |                   |   |
| AGGRESSIVITY      | -0.33         | -0.06             | -0.1         | 0.2         | -0.04        | 0.01          | 0.13          | 0.1         | 0.15         | 0.07          | 0.04          | -0.04      | -0.01       | 0.11        | 0.18        | 0.06         | 0.06        | 0.21          | 0.25       | 0.09          | 0.11        | 0.11         | 0.3        | 5.68 ± 1.5   | 0            | 0            | 0            | 0             | 0             | 0              | 0                 |   |
| REJECTION         | -0.37         | -0.21             | -0.19        | 0.43        | -0.14        | -0.05         | -0.05         | -0.14       | 0            | -0.1          | -0.11         | -0.04      | -0.01       | 0           | 0.31        | 0.26         | 0.2         | 0.28          | 0.24       | 0.26          | 0.34        | 0.36         | 0.44       | 0.15         | 13.51 ± 4.69 | 0.23         | 0            | 0             | 0             | 0              | 0                 |   |
| STRESS            | -0.38         | -0.35             | -0.28        | 0.53        | -0.1         | -0.02         | 0             | -0.02       | 0.03         | -0.17         | -0.08         | -0.07      | 0.03        | 0.01        | 0.25        | 0.34         | 0.23        | 0.28          | 0.26       | 0.32          | 0.45        | 0.44         | 0.47       | 0.2          | 0.53         | 20.64 ± 4.94 | -0.11        | -0.16         | 0             | 0              | 0                 |   |
| WELL_BEING        | 0.32          | 0.27              | 0.32         | -0.34       | 0            | -0.02         | -0.07         | -0.01       | -0.08        | 0.05          | 0.07          | 0.02       | -0.04       | -0.03       | -0.21       | -0.11        | -0.05       | -0.08         | -0.09      | -0.07         | -0.12       | -0.24        | -0.24      | -0.1         | -0.27        | -0.36        | 24.8 ± 10.54 | 0             | 0             | 0              | 0                 |   |
| SELF_EFFICACY     | 0.21          | 0.4               | 0.36         | -0.38       | 0.27         | -0.01         | 0.05          | 0.1         | -0.01        | 0.12          | 0.02          | 0.11       | 0.05        | 0.02        | -0.16       | -0.12        | -0.19       | -0.19         | -0.14      | -0.23         | -0.29       | -0.3         | -0.21      | -0.11        | -0.28        | -0.43        | 0.18         | 21.58 ± 10.2  | 0             | 0              | 0                 |   |
| SLEEP_QUALITY     | -0.14         | -0.25             | -0.15        | 0.32        | -0.05        | -0.1          | -0.07         | -0.05       | 0            | -0.08         | -0.06         | 0.02       | 0.06        | -0.03       | 0.1         | 0.2          | 0.11        | 0.18          | 0.14       | 0.26          | 0.34        | 0.5          | 0.17       | 0.07         | 0.23         | 0.32         | -0.17        | -0.23         | 4.67 ± 2.71   | 0.07           | 0                 |   |
| PAIN_INTENSITY    | -0.12         | -0.15             | -0.21        | 0.23        | -0.13        | 0.01          | -0.06         | -0.14       | -0.06        | -0.02         | -0.02         | 0          | 0.06        | -0.04       | 0.15        | 0.12         | 0.04        | 0.11          | 0.11       | 0.11          | 0.2         | 0.22         | 0.19       | 0.05         | 0.21         | 0.22         | -0.14        | -0.23         | 0.26          | 2.15 ± 1.94    | 0                 |   |
| PAIN_INTERFERENCE | 0.02          | 0.04              | -0.15        | 0.04        | 0            | -0.1          | 0             | -0.07       | -0.08        | -0.03         | -0.04         | -0.08      | -0.01       | -0.02       | 0           | 0.02         | 0.07        | 0             | -0.06      | -0.09         | -0.04       | -0.02        | 0.1        | -0.05        | -0.01        | -0.02        | 0.02         | 0.05          | -0.06         | -0.06          | 8.7 ± 2.97        |   |

**Table S4** List of the variables included in the study and the communities they were clustered in, across the three age groups

| <b>Variable</b>   | <b>Community<br/>(Young Adults)</b> | <b>Community<br/>(Middle-aged Adults)</b> | <b>Community<br/>(Older Adults)</b> |
|-------------------|-------------------------------------|-------------------------------------------|-------------------------------------|
| Agreeableness     | <b>Externalizing</b>                | <b>Externalizing</b>                      | <b>Mental_Health</b>                |
| Conscientiousness | <b>Mental_Health</b>                | <b>Mental_Health</b>                      | <b>Mental_Health</b>                |
| Extraversion      | <b>Mental_Health</b>                | <b>Mental_Health</b>                      | <b>Mental_Health</b>                |
| Neuroticism       | <b>Mental_Health</b>                | <b>Mental_Health</b>                      | <b>Mental_Health</b>                |
| Openness          | <b>High_Cognition</b>               | <b>Cognition</b>                          | <b>Cognition</b>                    |
| Pic_Seq           | <b>High_Cognition</b>               | <b>Cognition</b>                          | <b>Cognition</b>                    |
| Card_Sort         | <b>High_Cognition</b>               | <b>Cognition</b>                          | <b>Cognition</b>                    |
| Proc_Speed        | <b>Low_Cognition</b>                | <b>Cognition</b>                          | <b>Cognition</b>                    |
| List_Sort         | <b>Low_Cognition</b>                | <b>Cognition</b>                          | <b>Cognition</b>                    |
| Flanker           | <b>Low_Cognition</b>                | <b>Cognition</b>                          | <b>Cognition</b>                    |
| Oral_Read         | <b>High_Cognition</b>               | <b>Cognition</b>                          | <b>Cognition</b>                    |
| Emotion_Rec       | <b>High_Cognition</b>               | <b>Cognition</b>                          | <b>Cognition</b>                    |
| DD_40K            | <b>Delay_Discount</b>               | <b>Delay_Discount</b>                     | <b>Delay_Discount</b>               |
| DD_200            | <b>Delay_Discount</b>               | <b>Delay_Discount</b>                     | <b>Delay_Discount</b>               |
| Withdrawal        | <b>Mental_Health</b>                | <b>Mental_Health</b>                      | <b>Mental_Health</b>                |
| Thought_Prob      | <b>Mental_Health</b>                | <b>Mental_Health</b>                      | <b>Mental_Health</b>                |

|                   |                      |                      |                      |
|-------------------|----------------------|----------------------|----------------------|
| Rule_Break        | <b>Externalizing</b> | <b>Externalizing</b> | <b>Externalizing</b> |
| Externalizing     | <b>Externalizing</b> | <b>Externalizing</b> | <b>Externalizing</b> |
| Antisocial        | <b>Externalizing</b> | <b>Externalizing</b> | <b>Externalizing</b> |
| Anxiety           | <b>Mental_Health</b> | <b>Mental_Health</b> | <b>Mental_Health</b> |
| Hyperactivity     | <b>Mental_Health</b> | <b>Externalizing</b> | <b>Externalizing</b> |
| Depression        | <b>Mental_Health</b> | <b>Mental_Health</b> | <b>Mental_Health</b> |
| Aggressivity      | <b>Externalizing</b> | <b>Externalizing</b> | <b>Mental_Health</b> |
| Hostility         | <b>Mental_Health</b> | <b>Mental_Health</b> | <b>Mental_Health</b> |
| P_Rejection       | <b>Mental_Health</b> | <b>Mental_Health</b> | <b>Mental_Health</b> |
| P_Stress          | <b>Mental_Health</b> | <b>Mental_Health</b> | <b>Mental_Health</b> |
| Self_Efficacy     | <b>Mental_Health</b> | <b>Mental_Health</b> | <b>Mental_Health</b> |
| Well_Being        | <b>Mental_Health</b> | <b>Mental_Health</b> | <b>Mental_Health</b> |
| Sleep_Quality     | <b>Mental_Health</b> | <b>Mental_Health</b> | <b>Mental_Health</b> |
| Pain_Intensity    | <b>Pain</b>          | <b>Mental_Health</b> | <b>Mental_Health</b> |
| Pain_Interference | <b>Pain</b>          | <b>Mental_Health</b> | <b>Mental_Health</b> |

**Table S5** List of the edges that resulted to be significantly different between the networks estimated from the Young Adults and the Middle-aged Adults groups ( $p_{FDR} < .05$ ). Each node is codified by colour for the corresponding community (Dark Green = High\_Cognition; Light Green = Low\_Cognition / Cognition; Light Blue = Mental Health; Red = Externalizing; Purple = Pain). Differences are listed in descending order (absolute values)

| Young_Network     | Middle-aged_Network | Difference | p.value (FDR) |
|-------------------|---------------------|------------|---------------|
| PAIN_INTENSITY    | PAIN_INTERFERENCE   | 0.62       | 0.02          |
| EXTERNALIZING     | ANTISOCIAL          | 0.19       | 0.02          |
| NEUROTICISM       | HOSTILITY           | 0.17       | 0.02          |
| P_REJECTION       | PAIN_INTENSITY      | 0.12       | 0.02          |
| ANTISOCIAL        | AGGRESSIVITY        | 0.12       | 0.02          |
| NEUROTICISM       | PAIN_INTERFERENCE   | 0.11       | 0.02          |
| HOSTILITY         | SELF_EFFICACY       | 0.09       | 0.02          |
| CONSCIENTIOUSNESS | WELL_BEING          | 0.07       | 0.02          |
| EXTERNALIZING     | THOUGHT_PROB        | 0.07       | 0.02          |
| DEPRESSION        | HOSTILITY           | 0.06       | 0.02          |
| HOSTILITY         | WELL_BEING          | 0.06       | 0.02          |
| EXTERNALIZING     | DEPRESSION          | 0.06       | 0.02          |
| NEUROTICISM       | THOUGHT_PROB        | 0.05       | 0.02          |
| WITHDRAWAL        | HOSTILITY           | 0.05       | 0.02          |
| HYPERACTIVITY     | P_REJECTION         | 0.05       | 0.02          |
| THOUGHT_PROB      | SLEEP_QUALITY       | 0.05       | 0.02          |
| P_REJECTION       | WELL_BEING          | 0.04       | 0.02          |
| DEPRESSION        | ORAL_READ           | 0.04       | 0.02          |
| AGGRESSIVITY      | PIC_SEQ             | 0.04       | 0.05          |
| ANXIETY           | HOSTILITY           | 0.03       | 0.02          |
| ANXIETY           | P_STRESS            | 0.03       | 0.02          |
| DEPRESSION        | P_STRESS            | 0.03       | 0.02          |
| AGGRESSIVITY      | WITHDRAWAL          | 0.03       | 0.04          |
| AGGRESSIVITY      | PAIN_INTENSITY      | 0.03       | 0.05          |
| DEPRESSION        | FLANKER             | 0.02       | 0.02          |
| ANTISOCIAL        | PROC_SPEED          | 0.02       | 0.05          |
| AGGRESSIVITY      | RULE_BREAK          | 0.02       | 0.02          |
| ANTISOCIAL        | CONSCIENTIOUSNESS   | 0.02       | 0.02          |
| ANTISOCIAL        | SLEEP_QUALITY       | 0.01       | 0.04          |

**Table S6** List of the edges that resulted to be significantly different between the networks estimated from the Young Adults and the Older Adults groups ( $p_{FDR} < .05$ ). Each node is codified by colour for the corresponding community (Dark Green = High\_Cognition; Light Green = Low\_Cognition / Cognition; Light Blue = Mental Health; Red = Externalizing; Purple = Pain). Differences are listed in descending order (absolute values)

| Young_Network  | Older_Network     | Difference | p.value (FDR) |
|----------------|-------------------|------------|---------------|
| PAIN_INTENSITY | PAIN_INTERFERENCE | 0.52       | 0.02          |
| RULE_BREAK     | ANTISOCIAL        | 0.36       | 0.02          |
| EXTERNALIZING  | HYPERACTIVITY     | 0.32       | 0.02          |
| P_STRESS       | SELF_EFFICACY     | 0.18       | 0.02          |
| P_STRESS       | WELL_BEING        | 0.17       | 0.02          |
| P_REJECTION    | WELL_BEING        | 0.16       | 0.02          |
| ANTISOCIAL     | AGGRESSIVITY      | 0.16       | 0.02          |
| DEPRESSION     | HOSTILITY         | 0.11       | 0.02          |
| HOSTILITY      | WELL_BEING        | 0.10       | 0.02          |
| EXTERNALIZING  | THOUGHT_PROB      | 0.10       | 0.02          |
| HOSTILITY      | SELF_EFFICACY     | 0.09       | 0.04          |
| NEUROTICISM    | INTERFERENCE      | 0.07       | 0.04          |
| NEUROTICISM    | HOSTILITY         | 0.06       | 0.02          |
| EXTERNALIZING  | DEPRESSION        | 0.06       | 0.02          |
| HYPERACTIVITY  | P_REJECTION       | 0.05       | 0.02          |
| RULE_BREAK     | AGGRESSIVITY      | 0.04       | 0.02          |
| PIC_SEQ        | AGGRESSIVITY      | 0.04       | 0.02          |
| ANXIETY        | HOSTILITY         | 0.03       | 0.02          |
| HYPERACTIVITY  | P_STRESS          | 0.01       | 0.02          |
| DEPRESSION     | P_STRESS          | 0.01       | 0.02          |
| P_STRESS       | INTENSITY         | 0.01       | 0.04          |
| AGREEABLENESS  | WELL_BEING        | 0.01       | 0.02          |
| ANTISOCIAL     | CONSCIENTIOUSNESS | 0.01       | 0.04          |
| RULE_BREAK     | HYPERACTIVITY     | 0.01       | 0.02          |
| AGREEABLENESS  | P_STRESS          | 0.00       | 0.02          |

**Table S7** List of the edges that resulted to be significantly different between the networks estimated from the Middle-aged Adults and the Older Adults groups ( $p_{FDR} < .05$ ). Each node is codified by colour for the corresponding community (Green = Cognition; Light Blue = Health; Red = Externalizing). Differences are listed in descending order (absolute values)

| Middle-aged_Network | Older_Network | Difference | p.value (FDR) |
|---------------------|---------------|------------|---------------|
| RULE_BREAK          | ANTISOCIAL    | 0.28       | 0.02          |
| RULE_BREAK          | HYPERACTIVITY | 0.27       | 0.02          |
| EXTERNALIZING       | HYPERACTIVITY | 0.21       | 0.02          |
| RULE_BREAK          | EXTERNALIZING | 0.15       | 0.02          |
| AGREEABLENESS       | EXTERNALIZING | 0.10       | 0.02          |
| ORAL_READ           | WITHDRAWAL    | 0.06       | 0.02          |
| NEUROTICISM         | THOUGHT_PROB  | 0.05       | 0.02          |
| ANTISOCIAL          | HOSTILITY     | 0.03       | 0.02          |
| EXTERNALIZING       | P_STRESS      | 0.03       | 0.02          |
| CARD_SORT           | EXTERNALIZING | 0.03       | 0.02          |
| CONSCIENTIOUSNESS   | EXTERNALIZING | 0.02       | 0.02          |
| NEUROTICISM         | EXTERNALIZING | 0.02       | 0.02          |
| EXTERNALIZING       | DEPRESSION    | 0.02       | 0.02          |
| EXTERNALIZING       | HOSTILITY     | 0.02       | 0.02          |
| EXTERNALIZING       | P_REJECTION   | 0.02       | 0.02          |
| AGREEABLENESS       | ANTISOCIAL    | 0.02       | 0.02          |
| ANXIETY             | SLEEP_QUALITY | 0.01       | 0.02          |
| ANTISOCIAL          | DEPRESSION    | 0.01       | 0.02          |
| CONSCIENTIOUSNESS   | RULE_BREAK    | 0.00       | 0.02          |
